# Supplementary material for: How similar is the antibacterial activity of silver nanoparticles coated with different capping agents?
Source: Royal Society of Chemistry journal article supplement (doi:10.1039/d3ra00917c), 2023-01-01
Supplement: d3ra00917c1.pdf [file d3ra00917c1.pdf]

## Supplementary information

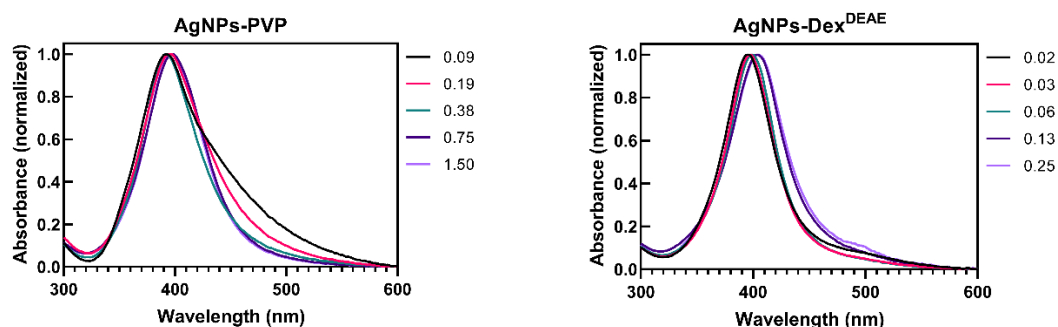

**Figure S1.** UV-vis spectra of AgNPs synthesised with different concentrations of PVP (right) and Dex<sup>DEAE</sup> (left). Labels correspond to the final concentration of the capping agent in mg.ml<sup>-1</sup>.

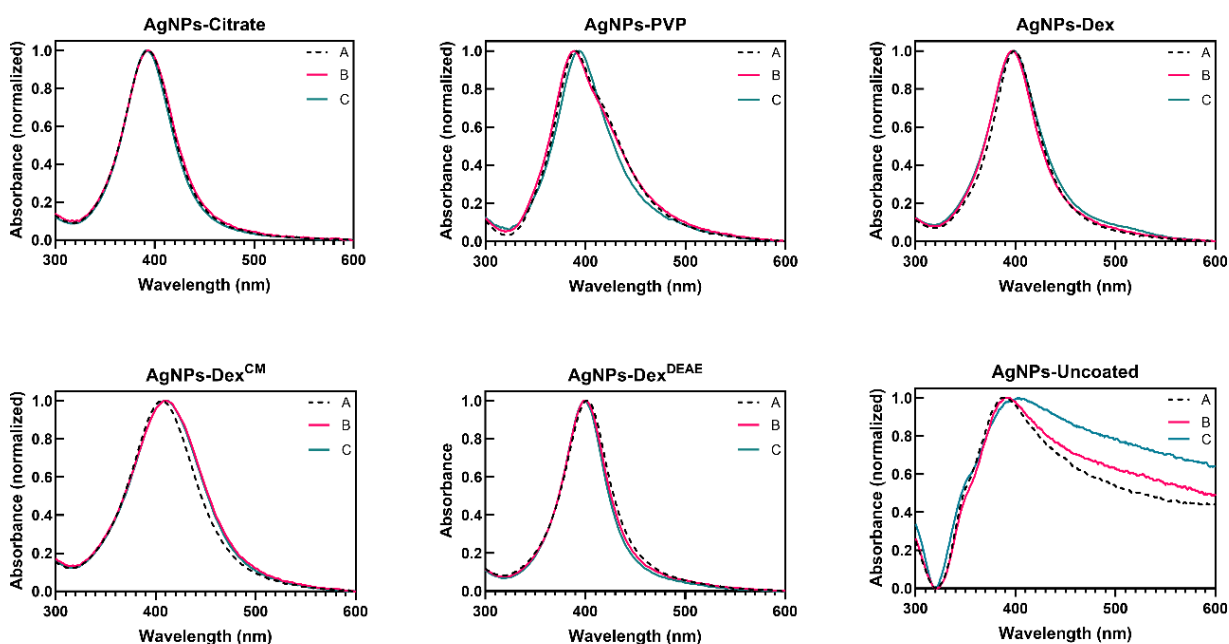

**Figure S2.** UV-vis spectra of independent replicates of AgNPs. The different replicates are labelled with different letters (A, B or C). The replicates were prepared on different days with fresh reagent solutions.

**Table S1.** Maximum absorbance wavelength ( $\lambda_{max}$ ) of the AgNPs after washing.

| AgNPs         | $\lambda_{max}$ (nm) |
|---------------|----------------------|
| AgNPs-Citrate | 389.0                |
| AgNPs-PVP     | 394.5                |

|                       |       |
|-----------------------|-------|
| <b>AgNPs-Dex</b>      | 398.0 |
| <b>AgNPs-DexCM</b>    | 398.0 |
| <b>AgNPs-DexDEAE</b>  | 406.0 |
| <b>AgNPs-Uncoated</b> | 388.5 |

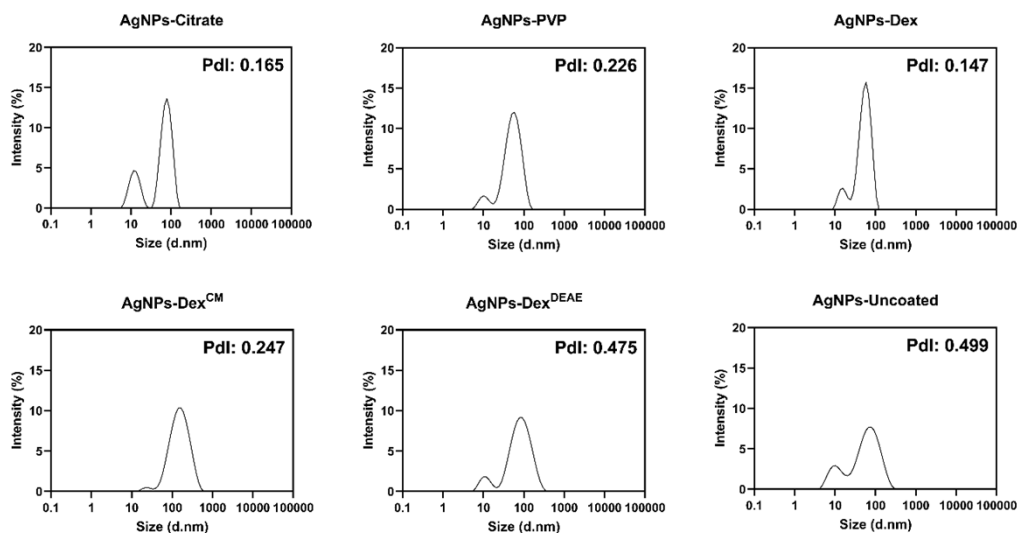

**Figure S3.** Size distribution by intensity determined by DLS of the AgNPs and corresponding polydispersity index (Pdl).

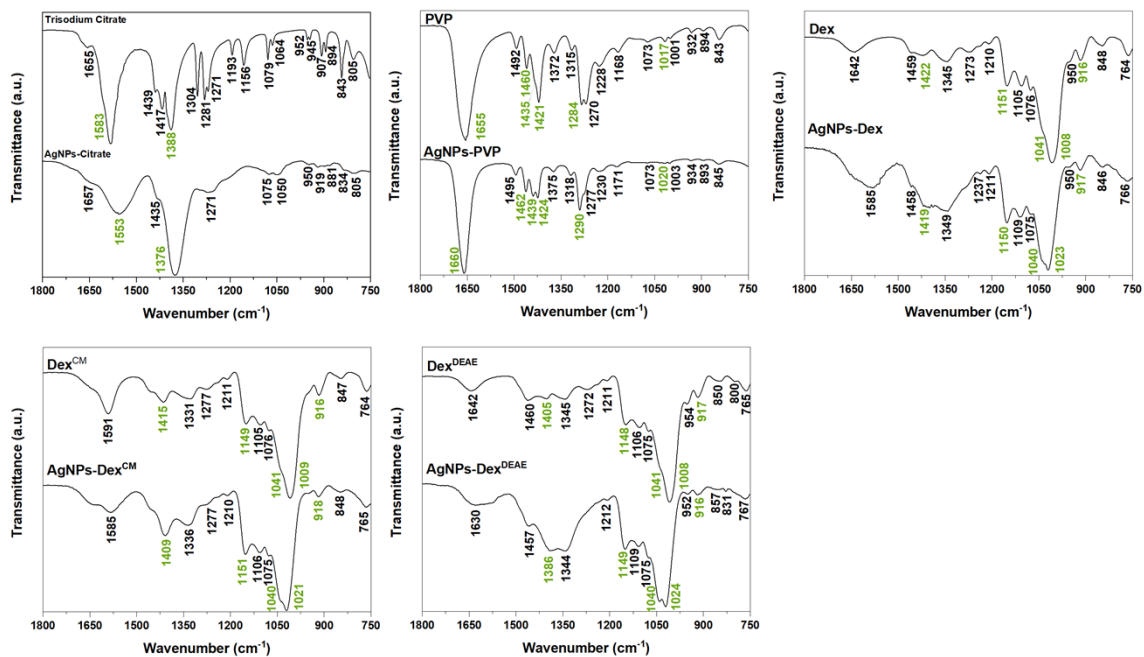

**Figure S4.** FTIR spectra of the AgNPs and respective capping agents.

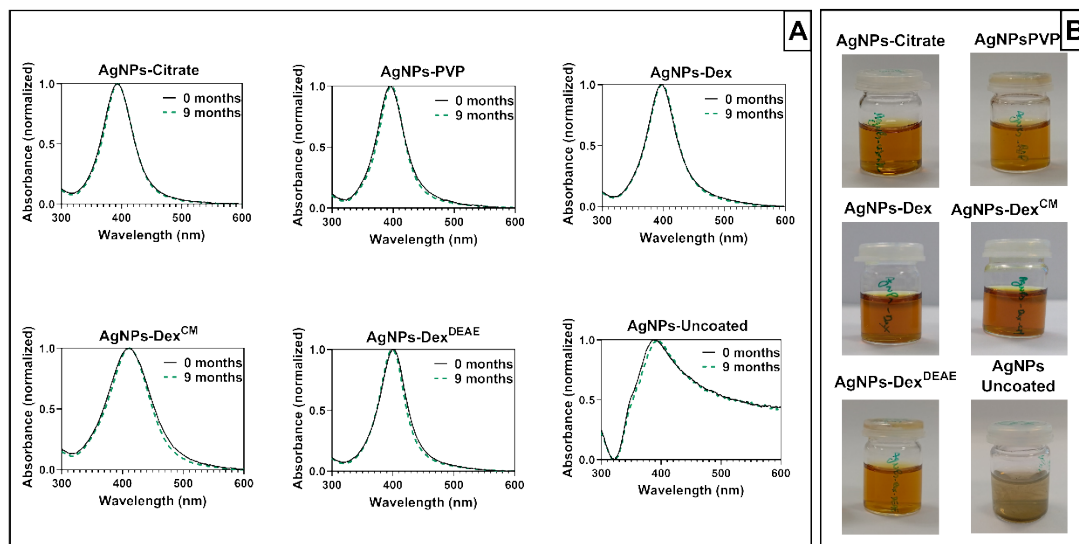

**Figure S5.** UV-vis spectra of the AgNPs after synthesis (0 months) and after being stored for 9 months (9 months) (A), and appearance of the colloidal dispersions after storage for 9 months (B).

**Table S2.** Composition of PBS buffer, MHB-O, MHB-S, LB and NB media. Values in brackets represent the concentration of the salt.

|              | Salts (g.L <sup>-1</sup> )                                                                    | Dehydrated infusion from beef (g.L <sup>-1</sup> ) | Meat extract (g.L <sup>-1</sup> ) | Casein hydrolysate (g.L <sup>-1</sup> ) | Starch (g.L <sup>-1</sup> ) | Yeast extract (g.L <sup>-1</sup> ) | Peptone |
|--------------|-----------------------------------------------------------------------------------------------|----------------------------------------------------|-----------------------------------|-----------------------------------------|-----------------------------|------------------------------------|---------|
| <b>PBS</b>   | NaCl (8)<br>Na <sub>2</sub> HPO <sub>4</sub> /KH <sub>2</sub> PO <sub>4</sub> (1)<br>KCl (10) | -                                                  | -                                 | -                                       | -                           | -                                  | -       |
| <b>MHB-O</b> | -                                                                                             | 300                                                | -                                 | 17.5                                    | 1.5                         | -                                  | -       |
| <b>MHB-S</b> | -                                                                                             | -                                                  | 2                                 | 17.5                                    | 1.5                         | -                                  | -       |
| <b>LB</b>    | NaCl (5)                                                                                      | -                                                  | -                                 | -                                       | -                           | 5                                  | 10      |
| <b>NB</b>    | NaCl (5)                                                                                      | -                                                  | 1                                 | -                                       | -                           | 2                                  | 5       |

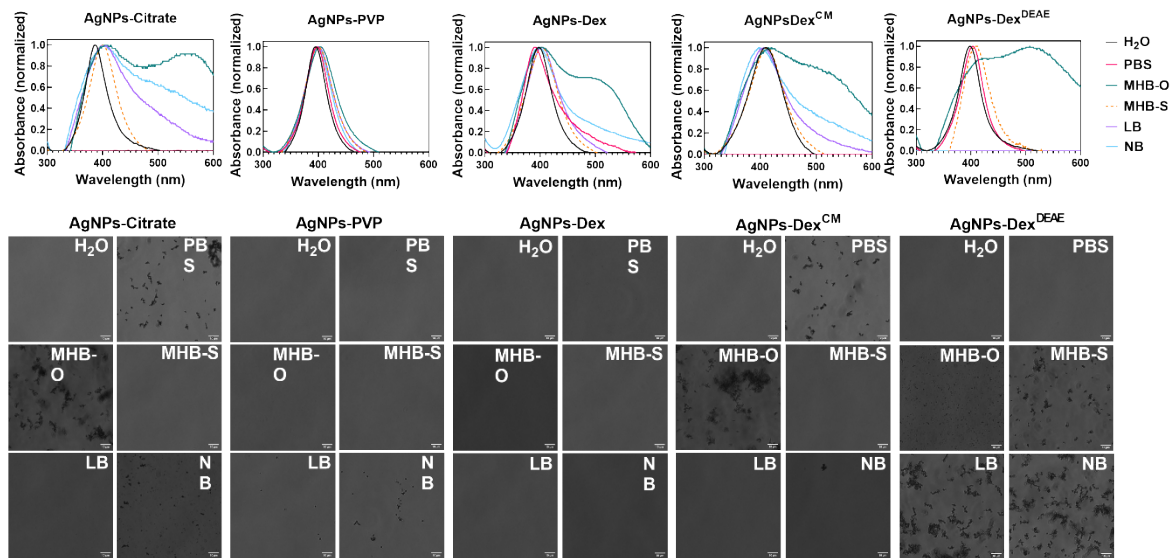

**Figure S6.** UV-vis spectra and respective transmittance images of the AgNPs in deionised water (H<sub>2</sub>O), PBS and different broths used for bacterial growth: MHB-O, MHB-S, LB and NB.

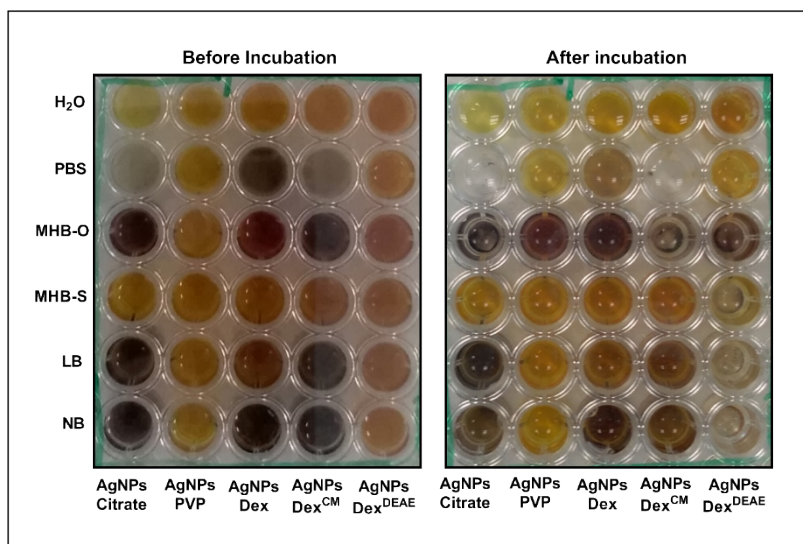

**Figure S7.** AgNPs in deionised water (H<sub>2</sub>O), PBS and different broths used for bacterial growth: MHB-O, MHB-S, LB and NB, before and after overnight incubation at 37°C.

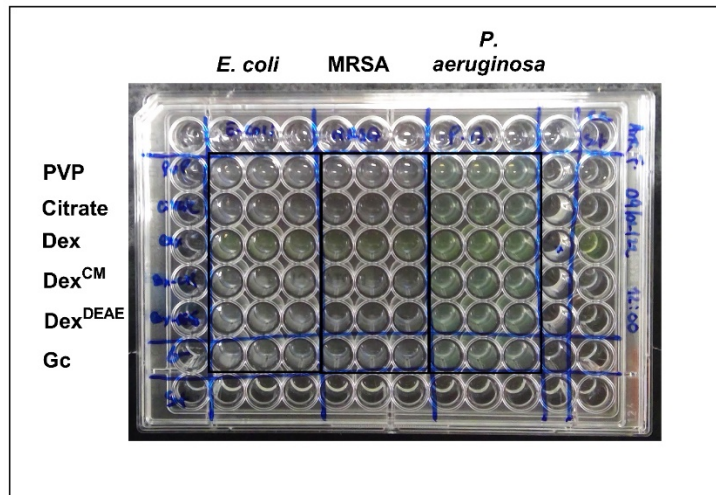

**Figure S8.** Microplate after incubation at 37°C for 20 hours with *E. coli*, MRSA and *P. aeruginosa* exposed to Citrate, PVP, Dex, Dex<sup>CM</sup> and Dex<sup>DEAE</sup>. The concentrations tested correspond to the theoretical amount of capping agent in a colloidal dispersion of AgNPs with a concentration of silver equal to 120 µg.ml<sup>-1</sup> (AgNPs-Dex and AgNPs-Dex<sup>CM</sup>), 240 µg.ml<sup>-1</sup> (AgNPs-Citrate and AgNPs-Dex<sup>DEAE</sup>), and 480 µg.ml<sup>-1</sup> (AgNPs-PVP). The concentrations tested are above the MBC. The growth control row (no capping agent) is labelled as Gc.

**Table S3.** Growth rates ( $\mu$ ), lag times ( $\lambda$ ), and asymptotic growth (A) of the studied AgNPs against *E. coli*, MRSA and *P. aeruginosa* and regression coefficients ( $R^2$ ).

| Bacteria             | AgNPs                     | $\lambda$<br>(min) | $\mu$ (min <sup>-1</sup> ) | A     | $R^2$ |
|----------------------|---------------------------|--------------------|----------------------------|-------|-------|
| <i>E. coli</i>       | Growth Control            | 257                | 1.6·10 <sup>-3</sup>       | 0.535 | 0.992 |
|                      | AgNPs-Citrate             | -                  | -                          | -     | -     |
|                      | AgNPs-PVP                 | 737                | 1.4·10 <sup>-3</sup>       | 0.713 | 0.992 |
|                      | AgNPs-Dex                 | -                  | -                          | -     | -     |
|                      | AgNPs-Dex <sup>CM</sup>   | -                  | -                          | -     | -     |
|                      | AgNPs-Dex <sup>DEAE</sup> | 261                | 1.3·10 <sup>-3</sup>       | 0.588 | 0.996 |
|                      | AgNPs-Uncoated            | 323                | 1.3·10 <sup>-3</sup>       | 0.759 | 0.994 |
| MRSA                 | Growth Control            | 241                | 1.2·10 <sup>-3</sup>       | 0.487 | 0.998 |
|                      | AgNPs-Citrate             | 267                | 7.9·10 <sup>-4</sup>       | 0.663 | 0.999 |
|                      | AgNPs-PVP                 | 204                | 7.9·10 <sup>-4</sup>       | 0.607 | 0.997 |
|                      | AgNPs-Dex                 | -                  | -                          | -     | -     |
|                      | AgNPs-Dex <sup>CM</sup>   | -                  | -                          | -     | -     |
|                      | AgNPs-Dex <sup>DEAE</sup> | 162                | 1.3·10 <sup>-3</sup>       | 0.497 | 0.999 |
|                      | AgNPs-Uncoated            | 326                | 8.9·10 <sup>-4</sup>       | 0.568 | 0.996 |
| <i>P. aeruginosa</i> | Growth Control            | 345                | 2.0·10 <sup>-3</sup>       | 0.711 | 0.978 |
|                      | AgNPs-Citrate             | -                  | -                          | -     | -     |

| <i>P. aeruginosa</i> | AgNPs-PVP                 | -   | -                    | -     | -     |
|----------------------|---------------------------|-----|----------------------|-------|-------|
|                      | AgNPs-Dex                 | -   | -                    | -     | -     |
|                      | AgNPs-Dex <sup>CM</sup>   | -   | -                    | -     | -     |
|                      | AgNPs-Dex <sup>DEAE</sup> | 986 | 2.2·10 <sup>-3</sup> | 2.455 | 0.994 |
|                      | AgNPs-Uncoated            | 371 | 2.1·10 <sup>-3</sup> | 0.936 | 0.999 |

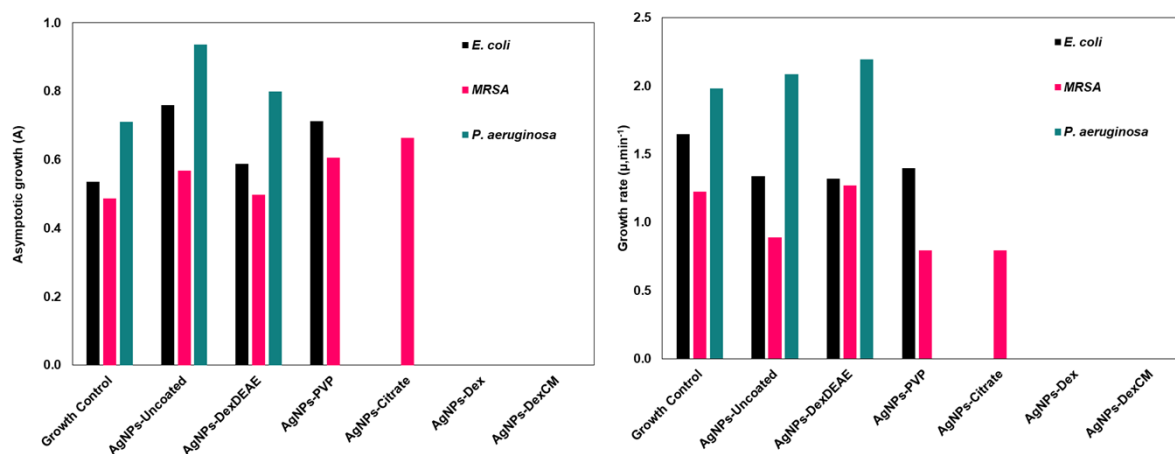

**Figure S9.** The influence of the capping agent on the growth rate  $\mu$  and asymptotic growth  $A$  of AgNPs against *E. coli*, MRSA and *P. aeruginosa*.

**Table S4.** MBEC of the AgNPs against MRSA and *P. aeruginosa* biofilms. The concentration represents the content of silver in the AgNPs. Specify medium used.

| MBEC ( $\mu\text{g}\cdot\text{ml}^{-1}$ ) | MRSA | <i>P. aeruginosa</i> |
|-------------------------------------------|------|----------------------|
| AgNPs-Citrate                             | 120  | 30                   |
| AgNPs-PVP                                 | 120  | 15                   |
| AgNPs-Dex                                 | 120  | 15                   |
| AgNPs-Dex <sup>CM</sup>                   | 60   | 15                   |
| AgNPs-Dex <sup>DEAE</sup>                 | >480 | >120                 |
| AgNPs-Uncoated                            | >960 | >960                 |

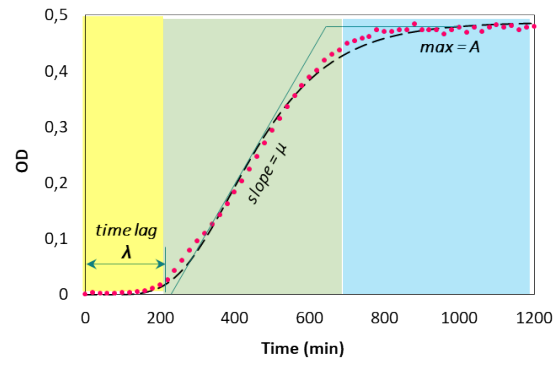

**Figure S10.** Typical growth curve of MRSA in the absence of AgNPs. Rosa points are the experimental data. Black dotted curve represents the fitting to Gompertz model. The growth curve has three growth phases: lag phase (yellow), log phase (green), and stationary phase (blue).
